# Supplementary figures and images for: Retinal Pigment Epithelium-Secreted VEGF-A Induces Alpha-2-Macroglobulin Expression in Endothelial Cells
Source: MDPI journal article supplement (doi:10.3390/cells11192975), 2022-09-24

Figure 4a

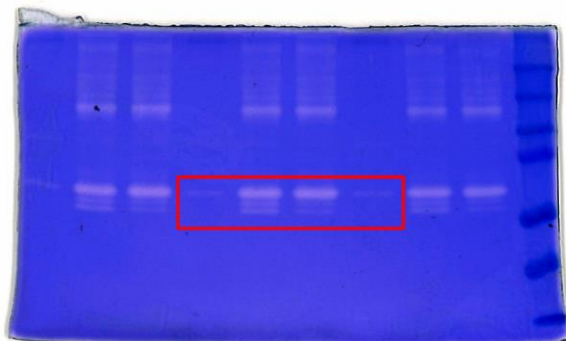

Figure 4c

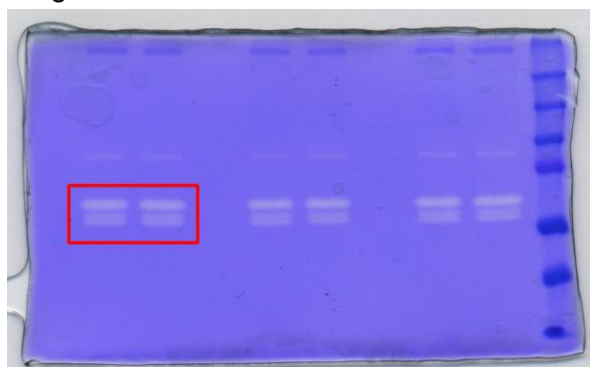

Figure 4f

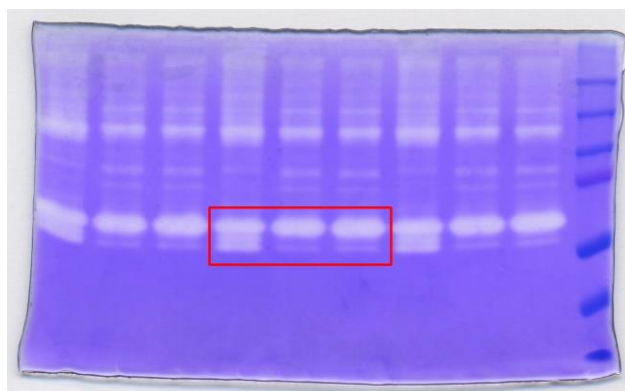

Supplement: s1 [file s1]

Figure 2b, αA2M

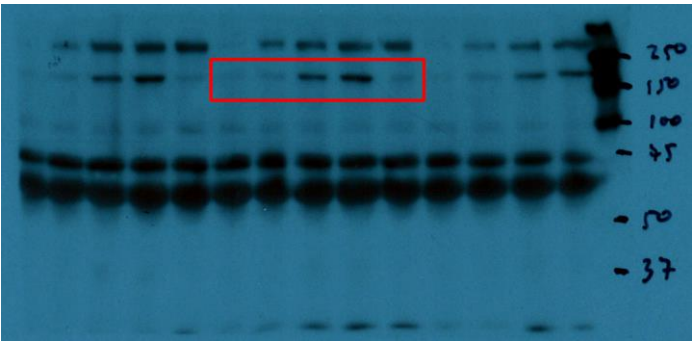

Figure 2b, αGAPDH

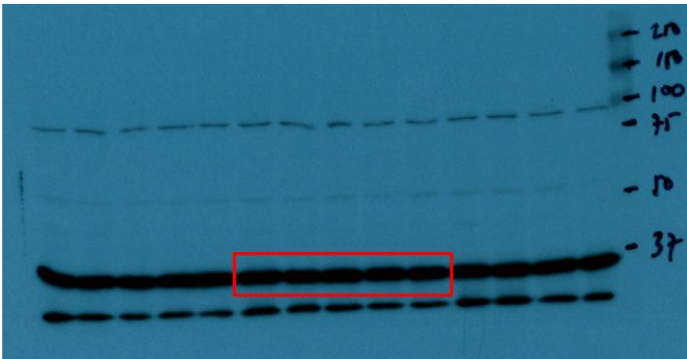

Figure 4b, αMMP-2

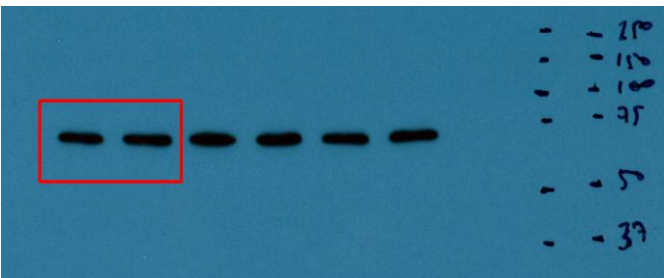

Figure 4b, αGAPDH

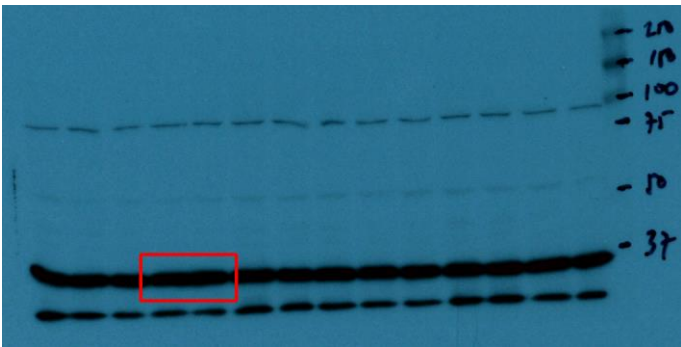

Figure 4e, αA2M

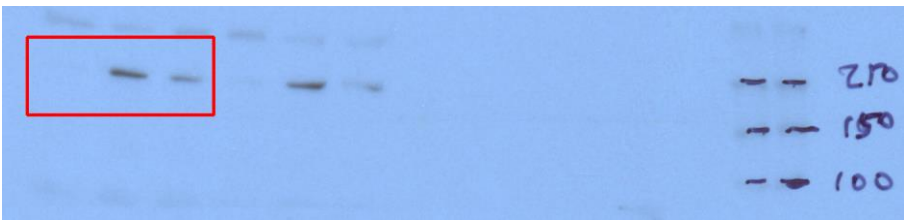

Figure 4e, αGAPDH

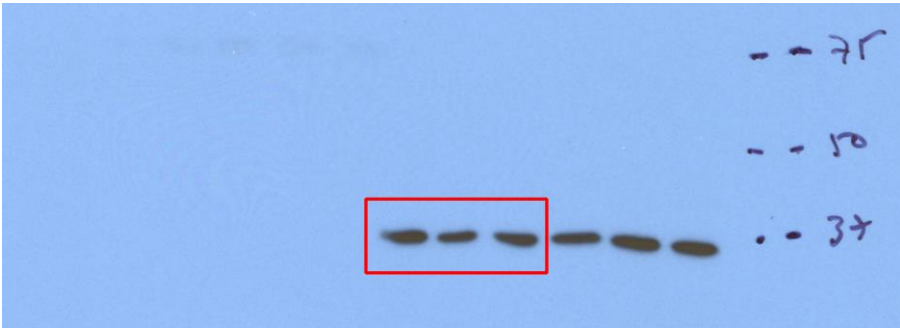

Supplement: s1 [file s1]
